# Supplementary material for: Gene Networks and microRNAs Implicated in Aggressive Prostate Cancer
Source: Oxford University Press journal article supplement (doi:10.1158/0008-5472.can-09-2183), 2009-12-08
Supplement: 00085472can092183-sup-stab_2.xls [file 00085472can092183-sup-stab_2.xls]

## Sheet: Supplementary Table 1
Supplementary Table 2. Differentially expressed mRNAs and miRNAs between aggressive and non-aggressove PC
Accession #	Symbol	Type of RNA	p-value	FDR qvalue
NM_021214	FAM108C1	mRNA	8.22e-18	7.03e-14
AK023660		mRNA	4.39e-16	1.88e-12
NM_002897	RBMS1	mRNA	1.55e-15	4.42e-12
NM_001083907	BANK1	mRNA	1.42e-13	3.03e-10
NM_018181	ZNF532	mRNA	4.83e-13	7.42e-10
NM_003579	RAD54L	mRNA	5.97e-13	7.42e-10
NM_016824	ADD3	mRNA	6.08e-13	7.42e-10
NM_001629	ALOX5AP	mRNA	1.13e-12	1.2e-09
NM_199413	PRC1	mRNA	2.15e-12	2.04e-09
NM_006397	RNASEH2A	mRNA	3e-12	2.56e-09
BX091728		mRNA	4.1e-12	2.95e-09
NM_001005339	RGS10	mRNA	4.34e-12	2.95e-09
NM_001100164	PHACTR2	mRNA	4.48e-12	2.95e-09
NM_022915	MRPL44	mRNA	1.09e-11	6.65e-09
NM_033274	ADAM19	mRNA	2.12e-11	1.2e-08
NM_182776	MCM7	mRNA	2.25e-11	1.2e-08
NM_001037540	SCML1	mRNA	2.71e-11	1.36e-08
NM_018412	ST7	mRNA	1.09e-10	5.18e-08
NM_016083	CNR1	mRNA	1.65e-10	7.22e-08
NM_144728	DUSP10	mRNA	1.69e-10	7.22e-08
NM_018412	ST7	mRNA	2.01e-10	8.18e-08
NM_003874	CD84	mRNA	2.25e-10	8.75e-08
CD677229		mRNA	2.54e-10	9.43e-08
NM_000067	CA2	mRNA	2.92e-10	1.04e-07
NM_173468	MOBKL1A	mRNA	3.6e-10	1.23e-07
NM_014573	TMEM97	mRNA	4.79e-10	1.57e-07
NM_017724	LRRFIP2	mRNA	5.25e-10	1.66e-07
NM_004091	E2F2	mRNA	6.07e-10	1.85e-07
NM_206926	SEPN1	mRNA	8.46e-10	2.49e-07
NM_003920	TIMELESS	mRNA	9.61e-10	2.66e-07
NM_001121	ADD3	mRNA	9.81e-10	2.66e-07
NM_005914	MCM4	mRNA	9.95e-10	2.66e-07
NM_003258	TK1	mRNA	1.09e-09	2.83e-07
NM_005389	PCMT1	mRNA	1.58e-09	3.97e-07
NM_001033	RRM1	mRNA	1.93e-09	4.72e-07
NM_001379	DNMT1	mRNA	2.12e-09	5.02e-07
NM_001032290	PSRC1	mRNA	2.28e-09	5.26e-07
NM_018715	RCC2	mRNA	2.79e-09	6.17e-07
NM_014791	MELK	mRNA	2.82e-09	6.17e-07
NM_000775	CYP2J2	mRNA	3.66e-09	7.78e-07
NM_001067	TOP2A	mRNA	3.74e-09	7.78e-07
NM_182649	PCNA	mRNA	4.1e-09	8.35e-07
NM_001786	CDC2	mRNA	4.49e-09	8.92e-07
NM_001457	FLNB	mRNA	4.69e-09	9.1e-07
NM_144601	CMTM3	mRNA	4.99e-09	9.48e-07
NM_004153	ORC1L	mRNA	6.27e-09	1.16e-06
NM_025108	C16orf59	mRNA	6.56e-09	1.18e-06
NM_003542	HIST1H4C	mRNA	6.66e-09	1.18e-06
NM_018410	DKFZp762E1312	mRNA	8.3e-09	1.45e-06
NM_207107	UCHL5IP	mRNA	9.42e-09	1.61e-06
NM_016448	DTL	mRNA	1e-08	1.68e-06
NM_020242	KIF15	mRNA	1.05e-08	1.71e-06
NM_181671	PITPNC1	mRNA	1.06e-08	1.71e-06
NM_001237	CCNA2	mRNA	1.3e-08	2.03e-06
NM_012177	FBXO5	mRNA	1.31e-08	2.03e-06
NM_005077	TLE1	mRNA	1.47e-08	2.24e-06
NM_006454	MXD4	mRNA	1.56e-08	2.34e-06
NM_001775	CD38	mRNA	1.59e-08	2.35e-06
NM_004336	BUB1	mRNA	1.65e-08	2.39e-06
NM_015987	HEBP1	mRNA	1.68e-08	2.4e-06
NM_014181	HSPC159	mRNA	1.79e-08	2.5e-06
NM_001014796	DDR2	mRNA	1.9e-08	2.62e-06
NM_018248	NEIL3	mRNA	1.97e-08	2.65e-06
NM_017929	PEX26	mRNA	1.99e-08	2.65e-06
DA753316		mRNA	2.24e-08	2.91e-06
NM_003318	TTK	mRNA	2.26e-08	2.91e-06
NM_015127	CLCC1	mRNA	2.3e-08	2.91e-06
NM_018063	HELLS	mRNA	2.31e-08	2.91e-06
NM_032637	SKP2	mRNA	2.53e-08	3.13e-06
NM_181356	SUPT3H	mRNA	2.99e-08	3.65e-06
NM_001098477	GRSF1	mRNA	3.26e-08	3.92e-06
NM_170753	PGBD3	mRNA	3.33e-08	3.96e-06
AK057981		mRNA	3.57e-08	4.15e-06
NM_020805	KLHL14	mRNA	3.59e-08	4.15e-06
NM_006479	RAD51AP1	mRNA	4.72e-08	5.38e-06
NM_006278	ST3GAL4	mRNA	4.88e-08	5.43e-06
NM_018154	ASF1B	mRNA	4.9e-08	5.43e-06
NM_003362	UNG	mRNA	5.97e-08	6.54e-06
NM_005733	KIF20A	mRNA	6.13e-08	6.56e-06
NM_001012968	SPIN4	mRNA	6.14e-08	6.56e-06
NM_021908	ST7	mRNA	6.93e-08	7.31e-06
NM_014604	TAX1BP3	mRNA	7.15e-08	7.45e-06
NM_152515	CKAP2L	mRNA	7.25e-08	7.47e-06
NM_018192	LEPREL1	mRNA	7.42e-08	7.47e-06
NM_175931	CBFA2T3	mRNA	7.55e-08	7.47e-06
NM_005607	PTK2	mRNA	7.59e-08	7.47e-06
NM_004629	FANCG	mRNA	7.61e-08	7.47e-06
NM_033111	LOC88523	mRNA	7.97e-08	7.62e-06
NM_018518	MCM10	mRNA	8.02e-08	7.62e-06
NM_012485	HMMR	mRNA	8.03e-08	7.62e-06
NM_001211	BUB1B	mRNA	8.37e-08	7.86e-06
NM_032844	MASTL	mRNA	8.47e-08	7.87e-06
NM_001005413	ZWINT	mRNA	8.99e-08	8.26e-06
CR596519		mRNA	9.34e-08	8.43e-06
NM_019013	FAM64A	mRNA	9.38e-08	8.43e-06
NM_000442	PECAM1	mRNA	9.97e-08	8.88e-06
NM_018101	CDCA8	mRNA	1.04e-07	9.14e-06
NM_018444	PPM2C	mRNA	1.05e-07	9.14e-06
NM_033417	NY-SAR-48	mRNA	1.06e-07	9.14e-06
NM_004393	DAG1	mRNA	1.11e-07	9.41e-06
NM_018454	NUSAP1	mRNA	1.11e-07	9.41e-06
NM_006461	SPAG5	mRNA	1.15e-07	9.62e-06
NM_012325	MAPRE1	mRNA	1.17e-07	9.69e-06
NM_016582	SLC15A3	mRNA	1.19e-07	9.74e-06
NM_024605	ARHGAP10	mRNA	1.28e-07	1.04e-05
NM_001669	ARSD	mRNA	1.3e-07	1.05e-05
XM_001127981	LOC728014	mRNA	1.32e-07	1.05e-05
NM_148170	CTSC	mRNA	1.36e-07	1.07e-05
NM_005229	ELK1	mRNA	1.37e-07	1.07e-05
NM_001274	CHEK1	mRNA	1.39e-07	1.08e-05
NM_001316	CSE1L	mRNA	1.53e-07	1.18e-05
NM_001080480	MBOAT1	mRNA	1.56e-07	1.19e-05
NM_032499	C15orf41	mRNA	1.6e-07	1.2e-05
NM_024875	SYNPO2L	mRNA	1.6e-07	1.2e-05
NM_005723	TSPAN5	mRNA	1.9e-07	1.41e-05
NM_015697	COQ2	mRNA	1.92e-07	1.41e-05
NM_198432	RGS12	mRNA	1.94e-07	1.42e-05
NM_006235	POU2AF1	mRNA	1.99e-07	1.44e-05
NM_018639	WSB2	mRNA	2e-07	1.44e-05
NM_181784	SPRED2	mRNA	2.02e-07	1.44e-05
NM_018685	ANLN	mRNA	2.06e-07	1.45e-05
NM_016343	CENPF	mRNA	2.11e-07	1.48e-05
NM_001065	TNFRSF1A	mRNA	2.21e-07	1.54e-05
NM_005715	UST	mRNA	2.26e-07	1.55e-05
NM_020770	CGN	mRNA	2.27e-07	1.55e-05
NM_021872	CDC25B	mRNA	2.55e-07	1.73e-05
NM_052889	COP1	mRNA	2.64e-07	1.77e-05
NM_014264	PLK4	mRNA	2.67e-07	1.78e-05
NM_002915	RFC3	mRNA	2.91e-07	1.93e-05
NM_001018115	FANCD2	mRNA	2.95e-07	1.94e-05
NM_032717	MAG1	mRNA	3.06e-07	2e-05
NM_001040167	LFNG	mRNA	3.24e-07	2.1e-05
NM_052880	PIK3IP1	mRNA	3.42e-07	2.19e-05
NM_152522	ARL6IP6	mRNA	3.53e-07	2.25e-05
XM_927280	LOC644033	mRNA	3.58e-07	2.26e-05
NM_001080449	DNA2L	mRNA	3.66e-07	2.29e-05
NM_007370	RFC5	mRNA	3.68e-07	2.29e-05
NM_014734	KIAA0247	mRNA	4.27e-07	2.63e-05
NM_006579	EBP	mRNA	4.28e-07	2.63e-05
NM_001071	TYMS	mRNA	4.32e-07	2.64e-05
NM_177989	ACTL6A	mRNA	4.51e-07	2.73e-05
NM_001735	C5	mRNA	4.74e-07	2.85e-05
NM_001042517	DIAPH3	mRNA	4.96e-07	2.94e-05
XM_001127981	LOC728014	mRNA	4.99e-07	2.94e-05
NM_138809	CMBL	mRNA	5.05e-07	2.94e-05
XM_939093	FAM89A	mRNA	5.1e-07	2.94e-05
NM_019063	EML4	mRNA	5.1e-07	2.94e-05
NM_002990	CCL22	mRNA	5.11e-07	2.94e-05
NM_018243	2009-09-11	mRNA	5.13e-07	2.94e-05
XR_015150	LOC730534	mRNA	5.2e-07	2.95e-05
NM_003309	TSPYL1	mRNA	5.25e-07	2.95e-05
NM_024680	E2F8	mRNA	5.25e-07	2.95e-05
NM_004910	PITPNM1	mRNA	5.3e-07	2.95e-05
NM_080668	CDCA5	mRNA	5.31e-07	2.95e-05
NM_005308	GRK5	mRNA	5.39e-07	2.96e-05
NM_032336	GINS4	mRNA	5.41e-07	2.96e-05
NM_175862	CD86	mRNA	5.44e-07	2.96e-05
NM_001005339	RGS10	mRNA	5.52e-07	2.99e-05
NM_001002800	SMC4	mRNA	5.62e-07	3.02e-05
NM_017724	LRRFIP2	mRNA	5.99e-07	3.18e-05
XM_001132495	SLC26A11	mRNA	6e-07	3.18e-05
NM_203327	SLC23A2	mRNA	6.04e-07	3.18e-05
NM_001255	CDC20	mRNA	6.06e-07	3.18e-05
NM_001020820	MYADM	mRNA	6.14e-07	3.2e-05
NM_014176	UBE2T	mRNA	7.18e-07	3.72e-05
NM_024094	DCC1	mRNA	7.38e-07	3.8e-05
NM_017602	OTUD5	mRNA	7.5e-07	3.82e-05
NM_014430	CIDEB	mRNA	7.5e-07	3.82e-05
NM_003806	HRK	mRNA	7.81e-07	3.95e-05
NM_006502	POLH	mRNA	8e-07	4.02e-05
NM_153353	LRRC34	mRNA	8.36e-07	4.17e-05
NM_002875	RAD51	mRNA	8.39e-07	4.17e-05
NM_175924	ILDR1	mRNA	8.89e-07	4.39e-05
NM_005573	LMNB1	mRNA	9.07e-07	4.45e-05
NM_002691	POLD1	mRNA	9.19e-07	4.49e-05
NM_014736	KIAA0101	mRNA	9.51e-07	4.6e-05
AB074172		mRNA	9.58e-07	4.6e-05
NM_001048197	SNHG3-RCC1	mRNA	9.59e-07	4.6e-05
NM_014646	LPIN2	mRNA	1.01e-06	4.81e-05
NM_002583	PAWR	mRNA	1.03e-06	4.87e-05
NM_017913	CDC37L1	mRNA	1.03e-06	4.87e-05
NM_139076	CCDC98	mRNA	1.07e-06	5.04e-05
NM_199229	RPE	mRNA	1.1e-06	5.13e-05
NM_000179	MSH6	mRNA	1.11e-06	5.18e-05
NM_018064	C6orf166	mRNA	1.16e-06	5.32e-05
NM_018131	CEP55	mRNA	1.16e-06	5.32e-05
NM_203301	FBXO33	mRNA	1.16e-06	5.32e-05
NM_016073	HDGFRP3	mRNA	1.18e-06	5.35e-05
NM_001316	CSE1L	mRNA	1.18e-06	5.35e-05
NM_002915	RFC3	mRNA	1.2e-06	5.4e-05
NM_006733	CENPI	mRNA	1.24e-06	5.54e-05
NM_004237	TRIP13	mRNA	1.28e-06	5.7e-05
NM_005192	CDKN3	mRNA	1.29e-06	5.7e-05
NM_006845	KIF2C	mRNA	1.34e-06	5.92e-05
NM_001008494	ISX	mRNA	1.36e-06	5.98e-05
NM_004701	CCNB2	mRNA	1.4e-06	6.11e-05
NM_004772	C5orf13	mRNA	1.42e-06	6.17e-05
NM_020342	SLC39A10	mRNA	1.43e-06	6.17e-05
NM_203401	STMN1	mRNA	1.44e-06	6.19e-05
NM_014750	DLG7	mRNA	1.5e-06	6.42e-05
XM_001128421	LOC728069	mRNA	1.57e-06	6.68e-05
NM_006623	PHGDH	mRNA	1.6e-06	6.78e-05
NM_006101	NDC80	mRNA	1.63e-06	6.85e-05
NM_004120	GBP2	mRNA	1.67e-06	7.02e-05
BG496257		mRNA	1.73e-06	7.2e-05
NM_003091	SNRPB	mRNA	1.75e-06	7.25e-05
NM_022145	CENPK	mRNA	1.77e-06	7.3e-05
NR_002183	FAM10A4	mRNA	1.89e-06	7.75e-05
NM_017801	CMTM6	mRNA	1.93e-06	7.89e-05
NM_015559	SETBP1	mRNA	1.95e-06	7.94e-05
NM_015891	CDC40	mRNA	2.09e-06	8.47e-05
NM_005500	SAE1	mRNA	2.28e-06	9.17e-05
NM_014333	CADM1	mRNA	2.29e-06	9.17e-05
XM_001132771	FAM116A	mRNA	2.33e-06	9.29e-05
NM_006317	BASP1	mRNA	2.41e-06	9.59e-05
NM_002959	SORT1	mRNA	2.45e-06	9.66e-05
NM_004523	KIF11	mRNA	2.45e-06	9.66e-05
NM_032270	LRRC8C	mRNA	2.54e-06	9.95e-05
NM_003504	CDC45L	mRNA	2.57e-06	0.000100386
NM_201559	FOXO3	mRNA	2.6e-06	0.000101123
NM_194442	LBR	mRNA	2.64e-06	0.000102041
NM_017549	EPDR1	mRNA	2.66e-06	0.000102041
XM_945048	LOC651957	mRNA	2.66e-06	0.000102041
NM_007086	WDHD1	mRNA	2.71e-06	0.000103367
NM_007111	TFDP1	mRNA	2.73e-06	0.000103656
NM_015037	KIAA0913	mRNA	2.76e-06	0.000104003
NM_004181	UCHL1	mRNA	2.77e-06	0.000104003
NM_002395	ME1	mRNA	2.78e-06	0.000104003
NM_002558	P2RX1	mRNA	2.79e-06	0.000104053
NM_199482	PREI3	mRNA	2.86e-06	0.000106315
NM_199327	SPRY1	mRNA	2.93e-06	0.000108363
NM_002338	LSAMP	mRNA	2.98e-06	0.000109671
NM_000234	LIG1	mRNA	3.08e-06	0.00011297
NM_032737	LMNB2	mRNA	3.12e-06	0.000113882
NM_004004	GJB2	mRNA	3.13e-06	0.000113882
NM_018270	C20orf20	mRNA	3.36e-06	0.000121789
NM_001001396	ATP2B4	mRNA	3.43e-06	0.000123577
NM_001259	CDK6	mRNA	3.44e-06	0.000123577
NM_002263	KIFC1	mRNA	3.47e-06	0.000124212
NM_152594	SPRED1	mRNA	3.79e-06	0.000135077
NM_005407	SALL2	mRNA	3.94e-06	0.000139635
NM_033397	KIAA1754	mRNA	3.96e-06	0.000139738
NM_016095	GINS2	mRNA	4.29e-06	0.000150165
NM_014450	SIT1	mRNA	4.3e-06	0.000150165
NM_018384	GIMAP5	mRNA	4.31e-06	0.000150165
NM_003304	TRPC1	mRNA	4.42e-06	0.000153603
NM_020127	TUFT1	mRNA	4.48e-06	0.000155087
NM_001938	DR1	mRNA	4.52e-06	0.00015521
NM_031965	GSG2	mRNA	4.52e-06	0.00015521
NM_004302	ACVR1B	mRNA	4.56e-06	0.000155872
NM_001064	TKT	mRNA	4.64e-06	0.000158111
NM_001382	DPAGT1	mRNA	4.74e-06	0.000160712
NM_032846	RAB2B	mRNA	4.77e-06	0.000161259
NM_020401	NUP107	mRNA	4.83e-06	0.00016236
NM_014875	KIF14	mRNA	4.98e-06	0.000166791
NM_201443	TEAD4	mRNA	5.02e-06	0.000166791
NM_003380	VIM	mRNA	5.03e-06	0.000166791
NM_014882	ARHGAP25	mRNA	5.04e-06	0.000166791
NM_005560	LAMA5	mRNA	5.14e-06	0.000169468
NM_015994	ATP6V1D	mRNA	5.18e-06	0.000170099
NM_031299	CDCA3	mRNA	5.22e-06	0.000170844
NM_203467	PPIL5	mRNA	5.39e-06	0.000175634
NM_006291	TNFAIP2	mRNA	5.41e-06	0.000175773
NM_015261	NCAPD3	mRNA	5.44e-06	0.000176077
NM_012198	GCA	mRNA	5.46e-06	0.000176122
NM_144724	MARVELD2	mRNA	5.56e-06	0.00017794
NM_015493	ANKRD25	mRNA	5.6e-06	0.00017794
NM_001017416	USP1	mRNA	5.62e-06	0.00017794
NM_002475	MYL6B	mRNA	5.62e-06	0.00017794
NM_001048201	UHRF1	mRNA	5.62e-06	0.00017794
NM_002668	PLP2	mRNA	5.73e-06	0.00018074
NM_001826	CKS1B	mRNA	5.97e-06	0.000187671
NM_001004333	MGC71993	mRNA	6.1e-06	0.000190496
NM_152562	CDCA2	mRNA	6.11e-06	0.000190496
NM_014214	IMPA2	mRNA	6.25e-06	0.000194247
NM_020647	JPH1	mRNA	6.32e-06	0.000195704
NM_018964	SLC37A1	mRNA	6.38e-06	0.000196905
NM_031942	CDCA7	mRNA	6.59e-06	0.000202619
NM_001444	FABP5	mRNA	6.66e-06	0.000203341
NM_152437	ZNF664	mRNA	6.66e-06	0.000203341
NM_005624	CCL25	mRNA	6.72e-06	0.000204215
NM_001105	ACVR1	mRNA	6.74e-06	0.000204215
NM_020733	HEG1	mRNA	6.83e-06	0.000206182
NM_003727	DNAH17	mRNA	7e-06	0.000210237
NM_032901	C12orf62	mRNA	7.03e-06	0.000210237
NM_001786	CDC2	mRNA	7.04e-06	0.000210237
NM_170740	ALDH5A1	mRNA	7.07e-06	0.000210371
NM_002168	IDH2	mRNA	7.09e-06	0.000210371
XM_926382	LOC642755	mRNA	7.13e-06	0.000210785
NM_020675	SPC25	mRNA	7.19e-06	0.000211656
NM_004526	MCM2	mRNA	7.21e-06	0.000211656
NM_002205	ITGA5	mRNA	7.37e-06	0.000215697
NM_199420	POLQ	mRNA	7.44e-06	0.000216837
NM_001008704	C6orf1	mRNA	7.5e-06	0.000217681
XM_928275	LOC645236	mRNA	7.52e-06	0.000217681
NM_025212	CXXC4	mRNA	7.54e-06	0.000217681
NM_024057	NUP37	mRNA	7.62e-06	0.000219371
NM_003503	CDC7	mRNA	8.06e-06	0.000231246
NM_030928	CDT1	mRNA	8.14e-06	0.000232646
NM_001017420	ESCO2	mRNA	8.4e-06	0.000239164
NM_006087	TUBB4	mRNA	8.65e-06	0.000245041
NM_015853	LOC51035	mRNA	8.66e-06	0.000245041
NM_080678	UBE2F	mRNA	8.71e-06	0.00024565
NM_006875	PIM2	mRNA	8.76e-06	0.00024619
NM_014397	NEK6	mRNA	8.82e-06	0.000247154
NM_020760	HECW2	mRNA	8.9e-06	0.000248495
NM_145648	SLC15A4	mRNA	9.14e-06	0.00025426
NM_002692	POLE2	mRNA	9.2e-06	0.00025426
XM_926382	LOC642755	mRNA	9.22e-06	0.00025426
NM_000104	CYP1B1	mRNA	9.24e-06	0.00025426
NM_001080951	PLAGL1	mRNA	9.26e-06	0.00025426
NM_018979	WNK1	mRNA	9.28e-06	0.00025426
NM_014622	LOH11CR2A	mRNA	9.34e-06	0.000254361
NM_001421	ELF4	mRNA	9.35e-06	0.000254361
XM_928876	LOC645904	mRNA	9.74e-06	0.000263913
NM_022157	RRAGC	mRNA	9.76e-06	0.000263913
NM_006527	SLBP	mRNA	9.96e-06	0.000268551
NM_003609	HIRIP3	mRNA	1e-05	0.00026858
NM_001035516	DMKN	mRNA	1.03e-05	0.000276268
NM_002129	HMGB2	mRNA	1.06e-05	0.000281779
NM_022809	CDC25C	mRNA	1.08e-05	0.000287113
NM_025126	RNF34	mRNA	1.09e-05	0.000290143
NM_032352	BRMS1L	mRNA	1.11e-05	0.000294178
NM_001814	CTSC	mRNA	1.12e-05	0.00029436
NM_003885	CDK5R1	mRNA	1.12e-05	0.000295715
NM_024871	MAP6D1	mRNA	1.14e-05	0.000299676
NM_020448	NPAL3	mRNA	1.16e-05	0.000301836
NM_001008938	CKAP5	mRNA	1.16e-05	0.00030214
NM_015553	PIP3-E	mRNA	1.18e-05	0.000306529
NM_006739	MCM5	mRNA	1.2e-05	0.000309776
NM_173083	LIN9	mRNA	1.22e-05	0.000314237
NM_015335	MED13L	mRNA	1.26e-05	0.000324181
BX109970		mRNA	1.26e-05	0.000324181
NM_004856	KIF23	mRNA	1.29e-05	0.00032786
NM_130469	JDP2	mRNA	1.29e-05	0.00032786
NM_145037	FAM55C	mRNA	1.29e-05	0.00032786
NM_003861	WDR22	mRNA	1.3e-05	0.000328602
XM_929980	LOC647000	mRNA	1.32e-05	0.000332939
NM_002767	PRPSAP2	mRNA	1.32e-05	0.000332939
NM_198436	AURKA	mRNA	1.34e-05	0.000337467
NM_018186	C1orf112	mRNA	1.36e-05	0.000340041
XM_937508	LOC387934	mRNA	1.39e-05	0.000346565
NM_181803	UBE2C	mRNA	1.39e-05	0.000346565
NM_001223	CASP1	mRNA	1.43e-05	0.000354261
NM_020890	KIAA1524	mRNA	1.5e-05	0.000371444
NM_018451	CENPJ	mRNA	1.5e-05	0.000371444
NM_000946	PRIM1	mRNA	1.53e-05	0.000375946
NM_002067	GNA11	mRNA	1.54e-05	0.000377438
NM_031423	NUF2	mRNA	1.56e-05	0.000382057
NM_007174	CIT	mRNA	1.56e-05	0.000382057
NM_015054	KIAA0701	mRNA	1.58e-05	0.000383229
NM_032868	MPND	mRNA	1.58e-05	0.000383229
NM_145018	C11orf82	mRNA	1.59e-05	0.00038524
NM_003848	SUCLG2	mRNA	1.66e-05	0.000401132
NM_006342	TACC3	mRNA	1.74e-05	0.000418117
NM_002194	INPP1	mRNA	1.75e-05	0.000420731
NM_001542	IGSF3	mRNA	1.77e-05	0.000422962
NM_017456	PSCD1	mRNA	1.77e-05	0.00042341
NM_002417	MKI67	mRNA	1.8e-05	0.0004278
NM_022346	NCAPG	mRNA	1.84e-05	0.000436442
NM_014109	ATAD2	mRNA	1.86e-05	0.00044041
NM_000949	PRLR	mRNA	1.87e-05	0.00044041
NM_006936	SUMO3	mRNA	1.9e-05	0.000445548
NM_182505	C9orf85	mRNA	1.9e-05	0.000445548
NM_178008	STARD13	mRNA	1.9e-05	0.000445548
NM_080655	C9orf30	mRNA	1.95e-05	0.000454928
NM_001047160	NET1	mRNA	1.96e-05	0.000455091
NM_032551	KISS1R	mRNA	1.96e-05	0.000455091
NM_017641	KIF21A	mRNA	1.98e-05	0.000457565
NM_005225	E2F1	mRNA	1.99e-05	0.000459004
NM_014383	ZBTB32	mRNA	1.99e-05	0.000459004
NM_014713	LAPTM4A	mRNA	2.03e-05	0.000466785
NM_018369	DEPDC1B	mRNA	2.06e-05	0.000471081
NM_024945	RMI1	mRNA	2.07e-05	0.000473745
NM_005902	SMAD3	mRNA	2.11e-05	0.000480658
NM_145060	C18orf24	mRNA	2.12e-05	0.000480658
AK094914		mRNA	2.14e-05	0.000483981
NM_198446	C1orf122	mRNA	2.16e-05	0.000489038
NM_0159450	SLC35C2	mRNA	2.21e-05	0.000497531
NM_004973	JARID2	mRNA	2.22e-05	0.000499995
NM_003899	ARHGEF7	mRNA	2.23e-05	0.000500215
NM_001042762	FIGNL1	mRNA	2.28e-05	0.000509216
NM_080653	ATP6V1E2	mRNA	2.29e-05	0.000511029
NM_005915	MCM6	mRNA	2.35e-05	0.000522219
NM_005263	GFI1	mRNA	2.38e-05	0.000527462
NM_003550	MAD1L1	mRNA	2.38e-05	0.000527462
NM_020062	SLC2A4RG	mRNA	2.42e-05	0.000535228
NM_001032385	PQBP1	mRNA	2.45e-05	0.000540221
NM_014500	HTATSF1	mRNA	2.48e-05	0.00054437
NM_014326	DAPK2	mRNA	2.53e-05	0.000552885
NM_005519	HMX2	mRNA	2.53e-05	0.000552885
NM_018242	SLC47A1	mRNA	2.57e-05	0.000560073
NM_014708	KNTC1	mRNA	2.59e-05	0.000562519
NM_000527	LDLR	mRNA	2.64e-05	0.000573515
NM_004040	RHOB	mRNA	2.67e-05	0.000578591
NM_001003891	PCQAP	mRNA	2.72e-05	0.000586806
NM_007006	NUDT21	mRNA	2.73e-05	0.000586806
NM_003020	SCG5	mRNA	2.74e-05	0.00058707
NM_006139	CD28	mRNA	2.74e-05	0.00058707
XM_942140	LOC652608	mRNA	2.77e-05	0.000592085
NM_018694	ARL6IP4	mRNA	2.86e-05	0.000609849
NM_001100118	XRCC3	mRNA	2.92e-05	0.000620008
NM_005018	PDCD1	mRNA	2.92e-05	0.000620008
NM_015426	WDR51A	mRNA	2.99e-05	0.00063264
NM_019040	ELP4	mRNA	3e-05	0.00063327
NM_031477	YPEL3	mRNA	3.02e-05	0.00063613
NM_018944	C21orf45	mRNA	3.03e-05	0.00063613
NM_139070	MAPK9	mRNA	3.04e-05	0.00063613
NM_001034	RRM2	mRNA	3.06e-05	0.00063613
NM_006694	JTB	mRNA	3.06e-05	0.00063613
NM_021915	ZNF69	mRNA	3.07e-05	0.00063613
NM_004281	BAG3	mRNA	3.07e-05	0.00063613
NM_012115	CASP8AP2	mRNA	3.07e-05	0.00063613
NM_005243	EWSR1	mRNA	3.14e-05	0.000649127
NM_000321	RB1	mRNA	3.15e-05	0.000649272
NM_002388	MCM3	mRNA	3.16e-05	0.000650117
NM_153746	ZDHHC14	mRNA	3.26e-05	0.000667485
NM_016053	CCDC53	mRNA	3.27e-05	0.000668866
NM_001018109	PIR	mRNA	3.3e-05	0.000673754
NM_018193	FANCI	mRNA	3.33e-05	0.000677134
NM_017669	ERCC6L	mRNA	3.34e-05	0.000677134
NM_032349	NUDT16L1	mRNA	3.35e-05	0.000678385
NM_012321	LSM4	mRNA	3.36e-05	0.000678701
NM_014740	EIF4A3	mRNA	3.4e-05	0.000684202
NM_021954	GJA3	mRNA	3.41e-05	0.000684202
CR622072		mRNA	3.41e-05	0.000684202
NM_003932	ST13	mRNA	3.43e-05	0.000687037
NM_001039846	C19orf36	mRNA	3.44e-05	0.000687037
NM_001287	CLCN7	mRNA	3.48e-05	0.000692268
NM_006618	JARID1B	mRNA	3.55e-05	0.000705735
NM_024908	WDR76	mRNA	3.57e-05	0.000706851
NM_153026	PRICKLE1	mRNA	3.59e-05	0.000710375
NM_012310	KIF4A	mRNA	3.64e-05	0.000718785
NM_178425	HDAC9	mRNA	3.65e-05	0.000718785
NM_004316	ASCL1	mRNA	3.68e-05	0.000723781
NM_005896	IDH1	mRNA	3.72e-05	0.000728598
CD639781		mRNA	3.75e-05	0.000732363
NM_003714	STC2	mRNA	3.76e-05	0.000733523
XM_928041	LOC644964	mRNA	3.8e-05	0.000739901
NM_024918	DSN1	mRNA	3.83e-05	0.00074298
NM_007207	DUSP10	mRNA	3.93e-05	0.000761189
NM_182985	TRIM69	mRNA	4e-05	0.000773466
NM_006027	EXO1	mRNA	4.01e-05	0.000774157
NM_001798	CDK2	mRNA	4.06e-05	0.000778877
NM_033394	TANC1	mRNA	4.06e-05	0.000778877
NM_000124	ERCC6	mRNA	4.07e-05	0.000778877
NM_005063	SCD	mRNA	4.15e-05	0.000794213
NM_032012	C9orf5	mRNA	4.24e-05	0.000808579
NM_001789	CDC25A	mRNA	4.31e-05	0.000821128
NM_003091	SNRPB	mRNA	4.34e-05	0.000824415
NM_052966	C1orf24	mRNA	4.37e-05	0.000827152
NM_001039569	AP1S3	mRNA	4.44e-05	0.000838617
NM_015161	ARL6IP1	mRNA	4.53e-05	0.000855434
NM_006231	POLE	mRNA	4.58e-05	0.000862852
NM_020200	PRTFDC1	mRNA	4.62e-05	0.000867856
NM_003580	NSMAF	mRNA	4.79e-05	0.000896738
NM_020438	DOLPP1	mRNA	4.8e-05	0.000896738
NM_001040456	RHBDD2	mRNA	4.81e-05	0.000896738
XR_018707	LOC650152	mRNA	4.82e-05	0.000896738
NM_177967	UBAC2	mRNA	4.86e-05	0.000902953
NM_000129	F13A1	mRNA	4.88e-05	0.00090446
NM_145061	C13orf3	mRNA	4.95e-05	0.000915088
NM_001012636	IL32	mRNA	4.98e-05	0.000919216
NM_173608	C14orf80	mRNA	5.01e-05	0.000921983
NM_079421	CDKN2D	mRNA	5.24e-05	0.000962183
NM_003641	IFITM1	mRNA	5.29e-05	0.000969156
NM_001029989	KIAA0101	mRNA	5.34e-05	0.000976983
NM_033426	KIAA1737	mRNA	5.35e-05	0.000977596
NM_015338	ASXL1	mRNA	5.4e-05	0.000983061
NM_006004	UQCRH	mRNA	5.48e-05	0.000994478
NM_002913	RFC1	mRNA	5.48e-05	0.000994478
NM_002068	GNA15	mRNA	5.57e-05	0.00100915
XM_937758	LOC148915	mRNA	5.6e-05	0.00101133
NM_016195	MPHOSPH1	mRNA	5.64e-05	0.00101744
NM_001025076	CUGBP2	mRNA	5.67e-05	0.00101768
NM_015651	PHF19	mRNA	5.67e-05	0.00101768
NM_006224	PITPNA	mRNA	5.68e-05	0.00101768
NM_021219	JAM2	mRNA	5.72e-05	0.00102264
NM_024491	CEP70	mRNA	5.87e-05	0.00104662
NM_018838	NDUFA12	mRNA	5.92e-05	0.00105387
NM_032290	ANKRD32	mRNA	5.95e-05	0.00105629
NM_207629	ABCG1	mRNA	5.99e-05	0.00106265
NM_001018069	SERBP1	mRNA	6.03e-05	0.0010662
XM_001134271	LOC730038	mRNA	6.09e-05	0.00107325
NM_013258	PYCARD	mRNA	6.09e-05	0.00107325
XM_929420	LOC653377	mRNA	6.19e-05	0.00108821
NM_007108	TCEB2	mRNA	6.24e-05	0.00109533
NM_014893	NLGN4Y	mRNA	6.3e-05	0.00110305
NM_001014438	CARS	mRNA	6.34e-05	0.00110544
NM_009588	LTB	mRNA	6.34e-05	0.00110544
NM_018136	ASPM	mRNA	6.36e-05	0.00110581
NM_015379	BRI3	mRNA	6.37e-05	0.00110581
NR_002814	LOC374443	mRNA	6.49e-05	0.00112495
NM_177424	STX12	mRNA	6.52e-05	0.00112648
NM_001080394	KIAA0146	mRNA	6.53e-05	0.00112648
NM_020423	SCYL3	mRNA	6.62e-05	0.00114116
NM_015190	DNAJC9	mRNA	6.65e-05	0.00114258
NM_004645	COIL	mRNA	6.66e-05	0.00114258
NM_002138	HNRPD	mRNA	6.76e-05	0.0011575
XM_929980	LOC647000	mRNA	6.77e-05	0.0011575
NM_005647	TBL1X	mRNA	7.01e-05	0.00119403
NM_025010	KLHL18	mRNA	7.02e-05	0.00119403
NM_022818	MAP1LC3B	mRNA	7.04e-05	0.00119403
NM_014396	VPS41	mRNA	7.04e-05	0.00119403
NM_002348	LY9	mRNA	7.1e-05	0.00120137
NM_032983	CASP2	mRNA	7.12e-05	0.00120276
NM_001008393	LOC201725	mRNA	7.2e-05	0.00121113
NM_016009	SH3GLB1	mRNA	7.21e-05	0.00121113
NM_080390	TCEAL2	mRNA	7.22e-05	0.00121113
XM_930677	LOC642299	mRNA	7.23e-05	0.00121113
NM_018083	ZNF358	mRNA	7.24e-05	0.00121113
NM_004416	DTX1	mRNA	7.28e-05	0.00121495
NM_001002762	DNAJB12	mRNA	7.29e-05	0.00121498
NM_012120	CD2AP	mRNA	7.32e-05	0.00121753
NM_002689	POLA2	mRNA	7.34e-05	0.00121834
NM_018087	TMEM48	mRNA	7.4e-05	0.00122516
NM_001080493	HSZFP36	mRNA	7.45e-05	0.0012317
NM_002358	MAD2L1	mRNA	7.5e-05	0.00123782
NM_198597	SEC24C	mRNA	7.53e-05	0.00123782
NM_001048166	STIL	mRNA	7.54e-05	0.00123782
NM_144607	CYB5D1	mRNA	7.55e-05	0.00123782
NM_001040668	BCL2L12	mRNA	7.62e-05	0.00124674
NM_139160	DEPDC7	mRNA	7.66e-05	0.00125072
BQ710274		mRNA	7.76e-05	0.00126536
NM_003174	SVIL	mRNA	7.8e-05	0.00126852
NM_015036	ENDOD1	mRNA	7.81e-05	0.00126852
NM_018342	TMEM144	mRNA	7.91e-05	0.00128249
NM_002573	PAFAH1B3	mRNA	8.12e-05	0.00131401
NM_005767	P2RY5	mRNA	8.16e-05	0.0013183
NM_152524	SGOL2	mRNA	8.2e-05	0.00132219
NM_001493	GDI1	mRNA	8.24e-05	0.00132602
NM_015094	HIC2	mRNA	8.32e-05	0.00133501
NM_004897	MINPP1	mRNA	8.33e-05	0.00133501
NM_012140	SLC25A10	mRNA	8.35e-05	0.00133676
NM_003276	TMPO	mRNA	8.48e-05	0.00135366
NM_004267	CHST2	mRNA	8.5e-05	0.00135477
BC037581		mRNA	8.56e-05	0.00136147
NM_001746	CANX	mRNA	8.62e-05	0.00136936
NM_078474	TM2D3	mRNA	8.66e-05	0.00137328
NM_201224	DDX47	mRNA	8.78e-05	0.001389
NM_004337	OSGIN2	mRNA	8.86e-05	0.00139703
NM_020690	MASK-BP3	mRNA	8.87e-05	0.00139703
NM_020197	SMYD2	mRNA	8.88e-05	0.00139703
NM_004169	SHMT1	mRNA	8.9e-05	0.00139703
NM_153450	MED19	mRNA	8.91e-05	0.00139703
NM_024830	AYTL2	mRNA	9.03e-05	0.00141395
NM_000190	HMBS	mRNA	9.05e-05	0.0014144
NM_024900	PHF17	mRNA	9.2e-05	0.00143461
NM_138340	ABHD3	mRNA	9.26e-05	0.00143876
NM_003506	FZD6	mRNA	9.26e-05	0.00143876
NM_006826	YWHAQ	mRNA	9.3e-05	0.0014419
NM_182687	PKMYT1	mRNA	9.54e-05	0.00147627
NM_001001936	AFAP1L2	mRNA	9.61e-05	0.00148006
NM_006713	SUB1	mRNA	9.62e-05	0.00148006
NM_144611	CYB5D2	mRNA	9.64e-05	0.00148006
NM_000465	BARD1	mRNA	9.64e-05	0.00148006
NM_003825	SNAP23	mRNA	9.65e-05	0.00148006
NM_005955	MTF1	mRNA	9.73e-05	0.0014906
NM_032122	DTNBP1	mRNA	9.94e-05	0.00152014
NM_000655	SELL	mRNA	9.99e-05	0.00152417
NM_002349	LY75	mRNA	0.000100188	0.00152604
NM_002184	IL6ST	mRNA	0.000101548	0.00154399
NM_006143	GPR19	mRNA	0.000102671	0.00155829
NM_000958	PTGER4	mRNA	0.000104021	0.00157599
NM_182666	UBE2E1	mRNA	0.000104527	0.00157599
NM_005916	MCM7	mRNA	0.00010453	0.00157599
NM_031266	HNRPAB	mRNA	0.000104607	0.00157599
NM_002286	LAG3	mRNA	0.000104759	0.00157599
NM_006889	CD86	mRNA	0.000105143	0.00157899
NM_020337	ANKRD50	mRNA	0.000106598	0.00159803
NM_015000	STK38L	mRNA	0.000107594	0.00161015
NM_003016	SFRS2	mRNA	0.000108512	0.00162104
NM_033089	ZCCHC3	mRNA	0.000108791	0.00162238
NM_152356	ZNF491	mRNA	0.000109295	0.00162705
NM_005483	CHAF1A	mRNA	0.000109955	0.00163403
XM_927336	LOC644113	mRNA	0.000111236	0.00165019
NM_138720	HIST1H2BD	mRNA	0.000113474	0.00168048
NM_005370	RAB8A	mRNA	0.000114241	0.00168892
NM_002208	ITGAE	mRNA	0.000114533	0.00169031
NM_001005291	SREBF1	mRNA	0.000114914	0.00169217
XM_940851	FLJ16686	mRNA	0.00011507	0.00169217
BE077462		mRNA	0.000115254	0.00169217
XM_932666	LOC643509	mRNA	0.000115646	0.00169502
NM_024844	NUP85	mRNA	0.000116574	0.00170555
NM_078626	CDKN2C	mRNA	0.000116764	0.00170555
NM_181573	RFC4	mRNA	0.000117677	0.00171242
NM_001025077	CUGBP2	mRNA	0.000117859	0.00171242
NM_022451	NOC3L	mRNA	0.000117991	0.00171242
NM_198950	NUDT1	mRNA	0.000118036	0.00171242
NM_000156	GAMT	mRNA	0.000118354	0.00171412
NM_006808	SEC61B	mRNA	0.000120476	0.00173929
NM_016647	C8orf55	mRNA	0.000120618	0.00173929
NM_017546	C2orf29	mRNA	0.000120702	0.00173929
NM_153246	MGC45491	mRNA	0.000120932	0.00173967
NM_000984	RPL23A	mRNA	0.000121662	0.0017463
NM_032801	JAM3	mRNA	0.000121801	0.0017463
NM_022068	FAM38B	mRNA	0.000122614	0.00175379
NM_001008537	KIAA2022	mRNA	0.000122796	0.00175379
NM_016464	TMEM138	mRNA	0.00012294	0.00175379
NM_001033568	RHOT1	mRNA	0.000123961	0.00176542
NM_033001	GTF2I	mRNA	0.000124915	0.00177604
NM_001037553	AGPAT3	mRNA	0.000126085	0.0017897
NM_183237	RNF7	mRNA	0.000127811	0.00181118
AL049390		mRNA	0.000129785	0.00183611
NM_177949	ARMCX2	mRNA	0.000130189	0.00183878
NM_174926	TMEM136	mRNA	0.00013098	0.0018469
NM_016547	SDF4	mRNA	0.000131933	0.00185728
NM_030640	DUSP16	mRNA	0.000132764	0.0018659
NM_001032289	SLC35A2	mRNA	0.000133961	0.00187963
NM_022730	COPS7B	mRNA	0.000134542	0.00188461
NM_021170	HES4	mRNA	0.000134796	0.00188461
NM_004457	ACSL3	mRNA	0.000134978	0.00188461
NM_012112	TPX2	mRNA	0.000135589	0.00189007
NM_001010883	FAM102B	mRNA	0.000136412	0.00189843
NM_001607	ACAA1	mRNA	0.000137659	0.00191267
NM_000690	ALDH2	mRNA	0.000138992	0.00192594
NM_006347	PPIH	mRNA	0.000139296	0.00192594
NM_001099286	FAM54A	mRNA	0.000139387	0.00192594
NM_147156	SGMS1	mRNA	0.000139515	0.00192594
NM_001045	SLC6A4	mRNA	0.000140456	0.0019358
NM_001386	DPYSL2	mRNA	0.000140957	0.00193957
NM_031300	MXD3	mRNA	0.000141378	0.00194224
NM_014037	SLC6A16	mRNA	0.000146393	0.00200791
BG207970		mRNA	0.000147109	0.00201449
XM_001129302	CDAN1	mRNA	0.000150806	0.00206182
NM_005441	CHAF1B	mRNA	0.0001527	0.00208438
NM_017955	CDCA4	mRNA	0.000154337	0.00210336
NM_001001438	LSS	mRNA	0.00015494	0.00210823
NM_021021	SNTB1	mRNA	0.000155658	0.00211239
NM_015086	DDN	mRNA	0.000155753	0.00211239
NM_001888	CRYM	mRNA	0.000155988	0.00211239
NM_002859	PXN	mRNA	0.000157899	0.00213488
NM_005056	JARID1A	mRNA	0.000158765	0.00214321
NM_001006937	TCEAL4	mRNA	0.000159228	0.00214607
NM_017785	CCDC99	mRNA	0.000161914	0.0021741
NM_001017980	LOC203547	mRNA	0.000162037	0.0021741
NM_001042476	CARHSP1	mRNA	0.000162071	0.0021741
NM_021998	ZNF711	mRNA	0.000167109	0.00223817
XM_371741	LOC389293	mRNA	0.000168685	0.00225574
NM_001836	CMA1	mRNA	0.000170381	0.00227485
NM_005067	SIAH2	mRNA	0.000172907	0.00230497
NM_001896	CSNK2A2	mRNA	0.000173829	0.00231366
NM_001042550	SMC2	mRNA	0.000175091	0.00232683
NM_005968	HNRPM	mRNA	0.000176156	0.00233735
NM_001291	CLK2	mRNA	0.000176578	0.00233931
NM_133491	SAT2	mRNA	0.000178243	0.00234827
XR_015190	LOC728037	mRNA	0.000178298	0.00234827
NM_138428	C1orf212	mRNA	0.000178339	0.00234827
XM_939065	LOC653971	mRNA	0.000178353	0.00234827
NM_004047	ATP6V0B	mRNA	0.000179164	0.00235531
NM_002497	NEK2	mRNA	0.000180096	0.00235952
NM_000721	CACNA1E	mRNA	0.000180195	0.00235952
NM_006738	AKAP13	mRNA	0.000180312	0.00235952
NM_199044	NSUN4	mRNA	0.000180591	0.00235955
BX116936		mRNA	0.000181574	0.00236878
NM_005983	SKP2	mRNA	0.000184264	0.00239804
NM_017867	C4orf27	mRNA	0.000184378	0.00239804
NM_152400	C4orf32	mRNA	0.000186585	0.00242305
NM_000433	NCF2	mRNA	0.000186894	0.00242339
NM_017858	TIPIN	mRNA	0.000188265	0.00243523
NM_003107	SOX4	mRNA	0.000188378	0.00243523
NM_012281	KCND2	mRNA	0.000190152	0.00245445
NM_001079669	TMTC4	mRNA	0.000190754	0.00245851
NM_001012267	CENPP	mRNA	0.000192477	0.00247474
NM_172232	ABCA5	mRNA	0.000192592	0.00247474
NM_002631	PGD	mRNA	0.000193418	0.00248161
NM_017815	C14orf94	mRNA	0.000195358	0.00250078
NM_178835	LOC152485	mRNA	0.000195497	0.00250078
NM_004341	CAD	mRNA	0.000198221	0.00253184
NM_002567	PEBP1	mRNA	0.000200631	0.00255821
NM_016332	SEPX1	mRNA	0.000200884	0.00255821
NM_201559	FOXO3	mRNA	0.000202534	0.00257537
NM_001025248	DUT	mRNA	0.000204887	0.00260143
NM_003371	VAV2	mRNA	0.000208005	0.0026371
NM_001107	ACYP1	mRNA	0.000209137	0.00264752
NM_002106	H2AFZ	mRNA	0.000211201	0.00266935
NM_012401	PLXNB2	mRNA	0.000211486	0.00266935
NM_004944	DNASE1L3	mRNA	0.000213803	0.00269461
NM_007278	GABARAP	mRNA	0.000214478	0.00269914
NM_018239	LRRC20	mRNA	0.000215082	0.00269956
NM_002167	ID3	mRNA	0.000215143	0.00269956
NM_003033	ST3GAL1	mRNA	0.000215662	0.00270209
NM_014049	ACAD9	mRNA	0.000216542	0.00270814
BX090408		mRNA	0.000216865	0.00270814
NM_000434	NEU1	mRNA	0.000217095	0.00270814
NM_003142	SSB	mRNA	0.000217519	0.00270947
NM_015187	KIAA0746	mRNA	0.000219537	0.00272422
NM_198900	FMNL3	mRNA	0.000219632	0.00272422
NM_024322	CENPO	mRNA	0.000219812	0.00272422
NM_012081	ELL2	mRNA	0.00022036	0.00272422
NM_052889	COP1	mRNA	0.000220382	0.00272422
NM_004737	LARGE	mRNA	0.000220616	0.00272422
NM_024738	C12orf49	mRNA	0.000221923	0.00273641
NM_032117	MND1	mRNA	0.000223733	0.00275475
NM_014291	GCAT	mRNA	0.000225216	0.00276902
NM_018092	NETO2	mRNA	0.000226015	0.00277486
NM_197973	ALG2	mRNA	0.00022824	0.00279815
CA391675		mRNA	0.000228676	0.00279861
NM_013299	SAC3D1	mRNA	0.000228933	0.00279861
NM_006263	PSME1	mRNA	0.000231118	0.00282129
NM_001077621	VPS37D	mRNA	0.000233172	0.0028423
NM_138352	SAMD1	mRNA	0.000234606	0.00285571
NM_002813	PSMD9	mRNA	0.000235329	0.0028588
NM_001017926	ZHX1	mRNA	0.000235529	0.0028588
NM_000377	WAS	mRNA	0.000236306	0.00286416
BG434868		mRNA	0.000237406	0.00287343
NM_024576	OGFRL1	mRNA	0.000238511	0.00288271
NM_018365	MNS1	mRNA	0.000246186	0.00297127
NM_020408	LYRM4	mRNA	0.000247764	0.00298609
NM_018326	GIMAP4	mRNA	0.000251098	0.00302202
NM_032483	PPAPDC1B	mRNA	0.000255606	0.00307195
NM_001035254	FAM102A	mRNA	0.000257097	0.00308258
NM_152309	PIK3AP1	mRNA	0.000257487	0.00308258
NM_031426	C9orf58	mRNA	0.000257573	0.00308258
NM_003726	SKAP1	mRNA	0.000260966	0.00311604
NM_018099	MLSTD1	mRNA	0.000261098	0.00311604
NM_003897	IER3	mRNA	0.000262647	0.00312835
NM_012291	ESPL1	mRNA	0.000262862	0.00312835
NM_030912	TRIM8	mRNA	0.000265636	0.00315329
BX098869		mRNA	0.000265696	0.00315329
NM_006405	TM9SF1	mRNA	0.000266187	0.00315474
NM_024641	MANEA	mRNA	0.000267466	0.00316313
NM_138335	GNPDA2	mRNA	0.000267636	0.00316313
NM_014366	GNL3	mRNA	0.000273338	0.00322607
NM_003070	SMARCA2	mRNA	0.000274789	0.00323872
NM_002819	PTBP1	mRNA	0.000275228	0.00323942
BX091613		mRNA	0.000276057	0.00324471
XM_931676	LOC643599	mRNA	0.000278311	0.00326671
NM_006591	POLD3	mRNA	0.000280221	0.00328302
NM_024585	ARMC7	mRNA	0.000280469	0.00328302
NM_001747	CAPG	mRNA	0.000280975	0.00328445
NM_005536	IMPA1	mRNA	0.000282346	0.0032944
NM_138635	H2AFV	mRNA	0.000282598	0.0032944
NM_004045	ATOX1	mRNA	0.000286273	0.00333039
NM_014015	DEXI	mRNA	0.000286465	0.00333039
NM_015137	KIAA0143	mRNA	0.000290064	0.00336766
NM_004252	SLC9A3R1	mRNA	0.000291213	0.00337048
NM_018407	LAPTM4B	mRNA	0.000291274	0.00337048
NM_001001660	LYRM5	mRNA	0.00029149	0.00337048
NM_178129	P2RY8	mRNA	0.000294369	0.00339916
NM_171846	LACTB	mRNA	0.00029667	0.00342112
NM_000249	MLH1	mRNA	0.000300286	0.00345458
NM_013333	EPN1	mRNA	0.000300381	0.00345458
NM_014811	KIAA0649	mRNA	0.000302262	0.00347155
NM_018972	GDAP1	mRNA	0.000302806	0.00347312
NM_001042465	PSAP	mRNA	0.000306965	0.00351611
NM_019045	WDR44	mRNA	0.000308529	0.00352929
NM_004289	NFE2L3	mRNA	0.00031052	0.00354732
NM_024032	C17orf53	mRNA	0.000311522	0.00355401
NM_020850	RANBP10	mRNA	0.000313318	0.00356974
NM_000418	IL4R	mRNA	0.000316391	0.00359575
NM_018641	CHST12	mRNA	0.000316442	0.00359575
NM_212469	CHKA	mRNA	0.000317582	0.0036039
NM_007069	HRASLS3	mRNA	0.00031819	0.00360602
NM_000024	ADRB2	mRNA	0.000324865	0.00367678
NM_012393	PFAS	mRNA	0.000325378	0.00367706
NM_006022	TSC22D1	mRNA	0.00032575	0.00367706
NM_138288	C14orf147	mRNA	0.000327145	0.00368399
NM_002370	MAGOH	mRNA	0.000327226	0.00368399
NM_005837	POP7	mRNA	0.000328623	0.00369033
NM_000214	JAG1	mRNA	0.000328653	0.00369033
NM_015492	C15orf39	mRNA	0.000329263	0.00369232
NM_001008211	OPTN	mRNA	0.000330441	0.00370068
NM_006725	CD6	mRNA	0.000332952	0.00372392
NM_015353	KCTD2	mRNA	0.000333426	0.00372434
NM_005189	CBX2	mRNA	0.000333862	0.00372434
NM_031484	MARVELD1	mRNA	0.000334425	0.00372576
NM_000332	ATXN1	mRNA	0.000336898	0.00374843
NM_001007224	GIMAP6	mRNA	0.000338818	0.00376489
NM_006166	NFYB	mRNA	0.000341069	0.00378498
NM_024056	TMEM106C	mRNA	0.000342595	0.00379698
NM_024100	WDR18	mRNA	0.000343672	0.00380398
NM_032188	MYST1	mRNA	0.000345238	0.00381222
NM_003170	SUPT6H	mRNA	0.000345308	0.00381222
NM_001008735	HMG1L1	mRNA	0.000348249	0.00383973
NM_138720	HIST1H2BD	mRNA	0.000351554	0.00387117
NM_004499	HNRPAB	mRNA	0.000352846	0.00388039
NM_001070	TUBG1	mRNA	0.000353608	0.00388378
NM_022740	HIPK2	mRNA	0.000360989	0.00395976
NM_007021	C10orf10	mRNA	0.000361686	0.00396232
NM_003826	NAPG	mRNA	0.0003629	0.00397052
NM_004217	AURKB	mRNA	0.000363735	0.00397457
NM_006403	NEDD9	mRNA	0.000364355	0.00397626
NM_004385	VCAN	mRNA	0.000365139	0.00397974
NM_000632	ITGAM	mRNA	0.000366113	0.00398257
NM_019058	DDIT4	mRNA	0.000366783	0.00398257
NM_018040	GPATCH2	mRNA	0.000366797	0.00398257
NM_024595	C1orf108	mRNA	0.000368451	0.00399425
NM_005657	TP53BP1	mRNA	0.000368808	0.00399425
NM_002836	PTPRA	mRNA	0.00037078	0.00401053
NM_006736	DNAJB2	mRNA	0.000376775	0.00407022
NM_005813	PRKD3	mRNA	0.000378387	0.00407832
NM_002728	PRG2	mRNA	0.000378606	0.00407832
NM_017944	USP47	mRNA	0.000379272	0.00407832
NM_017946	FKBP14	mRNA	0.000379449	0.00407832
NM_001013437	SEH1L	mRNA	0.000379911	0.00407832
NM_152686	DNAJC18	mRNA	0.000383166	0.0041081
NM_022092	CHTF18	mRNA	0.000383978	0.00411164
NM_014337	PPIL2	mRNA	0.000386455	0.00413263
NM_004813	PEX16	mRNA	0.000386905	0.00413263
NM_001014795	ILK	mRNA	0.000390858	0.00416964
DB025776		mRNA	0.000393666	0.00419436
NM_001752	CAT	mRNA	0.000397152	0.00422623
NM_015194	MYO1D	mRNA	0.000397891	0.00422883
NM_006399	BATF	mRNA	0.00040257	0.00427305
NM_001903	CTNNA1	mRNA	0.000403052	0.00427305
NM_057749	CCNE2	mRNA	0.00040743	0.00431412
NM_002441	MSH5	mRNA	0.000411357	0.00434795
NM_016567	BCCIP	mRNA	0.000411644	0.00434795
XM_932919	LOC283340	mRNA	0.00041271	0.00435384
NM_002624	PFDN5	mRNA	0.000417372	0.00439383
NM_012331	MSRA	mRNA	0.000417529	0.00439383
NM_006938	SNRPD1	mRNA	0.000423049	0.00444643
NM_012088	PGLS	mRNA	0.000424298	0.00444866
NM_001527	HDAC2	mRNA	0.000424302	0.00444866
NM_033502	TRERF1	mRNA	0.000427142	0.00447295
NM_012247	SEPHS1	mRNA	0.00043183	0.00451651
NM_005243	EWSR1	mRNA	0.000438427	0.0045799
NM_025113	C13orf18	mRNA	0.000442159	0.00461324
NM_014221	MTCP1	mRNA	0.000444984	0.00463706
NM_152274	FAM58A	mRNA	0.000446173	0.00464379
NM_014330	PPP1R15A	mRNA	0.00044699	0.00464663
XM_941392	CLK2	mRNA	0.00045018	0.0046741
NM_012130	CLDN14	mRNA	0.00045474	0.00471572
NM_001823	CKB	mRNA	0.000455784	0.00472082
NM_016542	MST4	mRNA	0.000461098	0.00477007
NR_002174	CMAH	mRNA	0.000462719	0.00478106
NM_014931	SAPS1	mRNA	0.000466952	0.00481409
NM_173064	IL28RA	mRNA	0.000467042	0.00481409
NM_014851	KLHL21	mRNA	0.000468207	0.00482028
NM_173602	DIP2B	mRNA	0.000468908	0.00482125
NM_000156	GAMT	mRNA	0.000469502	0.00482125
NM_018663	PXMP2	mRNA	0.000469994	0.00482125
NM_058173	MUCL1	mRNA	0.000473411	0.00485047
NM_015691	WWC3	mRNA	0.000474289	0.00485365
NM_152909	ZNF548	mRNA	0.000475943	0.00486475
XM_933660	LOC653752	mRNA	0.000480161	0.0049002
NM_032138	KBTBD7	mRNA	0.000480558	0.0049002
NM_005614	RHEB	mRNA	0.000483473	0.00492405
NM_013402	FADS1	mRNA	0.000486672	0.00495072
NM_032646	TTYH2	mRNA	0.000487346	0.00495169
NM_000714	TSPO	mRNA	0.000488945	0.00495919
NM_004658	RASAL1	mRNA	0.000489245	0.00495919
NM_015414	RPL36	mRNA	0.000492358	0.00498483
NM_001014279	C5orf39	mRNA	0.000493821	0.00499373
NM_001078650	TMEM134	mRNA	0.000495292	0.00500269
NM_006667	PGRMC1	mRNA	0.000499002	0.0050342
NM_006452	PAICS	mRNA	0.000499603	0.00503433
NM_005103	FEZ1	mRNA	0.000500203	0.00503443
NM_001042600	MAP4K1	mRNA	0.000509341	0.00512038
NM_006963	ZNF22	mRNA	0.000518366	0.00520498
NM_152742	GPC2	mRNA	0.00051964	0.00521165
NM_032872	SYTL1	mRNA	0.000522362	0.00523281
NR_002565	SNORD25	mRNA	0.000524523	0.00524766
NM_004092	ECHS1	mRNA	0.000525085	0.00524766
XM_927609	LOC221710	mRNA	0.000525688	0.00524766
NM_014872	ZBTB5	mRNA	0.000527234	0.00525696
NM_007280	OIP5	mRNA	0.000530387	0.00528223
BX102143		mRNA	0.000531102	0.0052832
NM_001666	ARHGAP4	mRNA	0.000533641	0.00530228
NM_012138	AATF	mRNA	0.00054471	0.00540598
NM_017926	C14orf118	mRNA	0.000556573	0.0055173
XM_941526	LOC652175	mRNA	0.000557539	0.00552048
NM_212469	CHKA	mRNA	0.000558876	0.00552731
AA082988		mRNA	0.000560666	0.00553861
NM_001079846	CREBBP	mRNA	0.00056442	0.00556131
NM_001040011	C9orf119	mRNA	0.00056487	0.00556131
NM_025239	PDCD1LG2	mRNA	0.000564917	0.00556131
NM_138484	SGOL1	mRNA	0.000567508	0.00558039
NM_002409	MGAT3	mRNA	0.000569614	0.00559147
NM_001001661	ZNF425	mRNA	0.000569944	0.00559147
NM_199295	APITD1	mRNA	0.000571664	0.00560192
NM_170662	CBLB	mRNA	0.000572415	0.00560284
XM_934138	KIAA0748	mRNA	0.000573221	0.00560389
NM_152463	EME1	mRNA	0.000573941	0.00560389
NM_001014380	KATNAL1	mRNA	0.000574489	0.00560389
NM_032444	BTBD12	mRNA	0.000578096	0.00563265
NM_001018077	NR3C1	mRNA	0.000579494	0.00563983
NM_031281	FCRL5	mRNA	0.000583737	0.00567466
XM_209597	LOC285407	mRNA	0.000585209	0.00568251
NM_173469	UBE2Q2	mRNA	0.000589496	0.00571764
NM_207346	TSEN54	mRNA	0.000591371	0.00572932
XM_941444	LOC652113	mRNA	0.000597325	0.00578046
NM_004685	MTMR6	mRNA	0.000598521	0.00578403
NM_024065	PDCL3	mRNA	0.000599049	0.00578403
NM_003173	SUV39H1	mRNA	0.000599927	0.00578598
NM_139352	TAF1A	mRNA	0.000603953	0.00581823
AI401284		mRNA	0.000605535	0.00582691
XM_926656	LOC643310	mRNA	0.000610052	0.00586377
NM_003185	TAF4	mRNA	0.00061204	0.00587627
NM_176801	ADD1	mRNA	0.000617	0.00591725
NM_152266	C19orf40	mRNA	0.000621138	0.00595025
NM_003866	INPP4B	mRNA	0.000627836	0.00600182
NM_020676	ABHD6	mRNA	0.000627926	0.00600182
NM_201548	CERKL	mRNA	0.000633115	0.00604466
NM_023034	WHSC1L1	mRNA	0.000634716	0.00605318
NM_001012271	BIRC5	mRNA	0.000637444	0.00607242
NM_018184	ARL8B	mRNA	0.000640697	0.00609661
NM_002513	NME3	mRNA	0.000642019	0.0061024
NM_017975	ZWILCH	mRNA	0.000643116	0.00610603
XM_373670		mRNA	0.000647075	0.0061368
NM_175872	ZNF792	mRNA	0.000648368	0.00614224
NM_002250	KCNN4	mRNA	0.000649093	0.0061423
NM_145312	ZNF485	mRNA	0.000660295	0.00624139
NM_201997	SF1	mRNA	0.000661873	0.0062494
NM_001100417	C14orf130	mRNA	0.000663515	0.00625799
NM_000059	BRCA2	mRNA	0.000682726	0.00642987
XM_943286	LOC648354	mRNA	0.000683245	0.00642987
XM_001132711	RFNG	mRNA	0.000690325	0.00648646
NM_022059	CXCL16	mRNA	0.000690776	0.00648646
NM_003172	SURF1	mRNA	0.000692296	0.0064936
NM_003475	RASSF7	mRNA	0.000693266	0.00649557
NM_021970	MAP2K1IP1	mRNA	0.000695515	0.00650394
NM_003977	AIP	mRNA	0.000697896	0.00650394
NM_001813	CENPE	mRNA	0.000698021	0.00650394
NM_006328	RBM14	mRNA	0.000698235	0.00650394
NM_001078166	SFRS1	mRNA	0.000698397	0.00650394
NM_002644	PIGR	mRNA	0.000699332	0.00650394
BX647087		mRNA	0.000699778	0.00650394
NM_152680	TMEM154	mRNA	0.000700249	0.00650394
NM_006833	COPS6	mRNA	0.000703348	0.00652563
NM_017899	TESC	mRNA	0.000709637	0.00657684
NM_001565	CXCL10	mRNA	0.000712401	0.00659531
NM_030771	CCDC34	mRNA	0.000719639	0.0066551
NM_001034194	EXOSC9	mRNA	0.000720552	0.00665635
NM_002910	RENBP	mRNA	0.000721466	0.00665758
NM_033286	C15orf23	mRNA	0.000725137	0.00668085
XR_019071	LOC642333	mRNA	0.00072555	0.00668085
XR_000543	MGC24125	mRNA	0.000730177	0.00671473
DA886662		mRNA	0.000730801	0.00671473
NM_139242	MTFMT	mRNA	0.000733469	0.00672223
NM_007146	VEZF1	mRNA	0.000733604	0.00672223
NM_017615	NSMCE4A	mRNA	0.000733978	0.00672223
NM_001530	HIF1A	mRNA	0.000738799	0.00675912
NM_021824	NIF3L1	mRNA	0.000740503	0.00675912
AA824371		mRNA	0.000740534	0.00675912
XM_940610	LOC651453	mRNA	0.000742559	0.00675912
NM_014766	SCRN1	mRNA	0.00074269	0.00675912
NM_005898	CAPRIN1	mRNA	0.000743648	0.00675912
NM_003337	UBE2B	mRNA	0.000743775	0.00675912
NM_145341	PDCD4	mRNA	0.000744333	0.00675912
NM_198844	ZPBP2	mRNA	0.000748174	0.00678453
NM_018163	DNAJC17	mRNA	0.000748901	0.00678453
NM_018066	ATPBD1B	mRNA	0.000749514	0.00678453
NM_014808	FARP2	mRNA	0.000753596	0.00681426
NM_018132	CENPQ	mRNA	0.000756877	0.00683669
NM_001010927	TIAM2	mRNA	0.000758192	0.00684134
NM_016309	LCMT1	mRNA	0.000761917	0.0068677
NM_032340	C6orf125	mRNA	0.000764416	0.00688297
NM_000211	ITGB2	mRNA	0.000767373	0.00690232
NM_052864	TIFA	mRNA	0.000768255	0.00690298
NM_005561	LAMP1	mRNA	0.000770493	0.00691582
NM_004299	ABCB7	mRNA	0.000772366	0.00692536
XM_937968	LOC401115	mRNA	0.000775892	0.00694968
NM_030634	ZNF436	mRNA	0.000778173	0.00696281
NM_022735	ACBD3	mRNA	0.000779653	0.00696876
NM_022373	HERPUD2	mRNA	0.000786711	0.0070245
NM_014701	KIAA0256	mRNA	0.000788024	0.00702888
BU742963		mRNA	0.000791159	0.00704948
NM_004814	WDR57	mRNA	0.00079217	0.00705114
NM_005334	HCFC1	mRNA	0.000813685	0.00723511
XM_001133760	ZNF519	mRNA	0.000815446	0.00724323
NM_001085354	MORC4	mRNA	0.000829703	0.00736211
NM_001761	CCNF	mRNA	0.000830553	0.00736211
NM_001856	COL16A1	mRNA	0.000834286	0.00738305
NM_016309	LCMT1	mRNA	0.000834643	0.00738305
NM_012232	PTRF	mRNA	0.000837427	0.00740001
NM_006370	VTI1B	mRNA	0.000840022	0.00741528
NM_006675	TSPAN9	mRNA	0.000846559	0.00746065
NM_018492	PBK	mRNA	0.000848542	0.00746065
NM_020682	AS3MT	mRNA	0.000848544	0.00746065
NM_005680	TAF1B	mRNA	0.000849324	0.00746065
NM_007170	TESK2	mRNA	0.000849528	0.00746065
NM_014160	MKRN2	mRNA	0.000852116	0.0074757
NM_005563	STMN1	mRNA	0.000853323	0.00747789
NM_014637	MTFR1	mRNA	0.000854116	0.00747789
NM_005527	HSPA1L	mRNA	0.000861039	0.00753079
NM_017779	DEPDC1	mRNA	0.000863694	0.00754629
NM_003492	TMEM187	mRNA	0.000866774	0.00756546
NM_004156	PPP2CB	mRNA	0.000868854	0.00756877
NM_145287	ZNF519	mRNA	0.000868925	0.00756877
NM_003906	MCM3AP	mRNA	0.000870206	0.00757221
NM_138957	MAPK1	mRNA	0.000871839	0.00757526
NM_016818	ABCG1	mRNA	0.000872329	0.00757526
NM_012261	C20orf103	mRNA	0.000878842	0.00762407
NM_001010862	SPIN3	mRNA	0.000882928	0.00765175
BG222004		mRNA	0.00088542	0.00765175
NM_177947	ARMCX3	mRNA	0.000885662	0.00765175
NM_176878	INADL	mRNA	0.000886399	0.00765175
NM_199418	PRCP	mRNA	0.00088651	0.00765175
NM_130435	PTPRE	mRNA	0.000888115	0.00765787
NM_014051	TMEM14A	mRNA	0.000890333	0.00766924
NM_001099270	ZBTB34	mRNA	0.000892428	0.00767955
NM_020133	AGPAT4	mRNA	0.000895097	0.00769477
NM_134426	SLC26A6	mRNA	0.000900288	0.00773162
NM_001099283	ZNF239	mRNA	0.000910102	0.00780805
NM_030763	NSBP1	mRNA	0.000912175	0.00781281
NM_017644	KLHL24	mRNA	0.000912485	0.00781281
NM_018456	EAF2	mRNA	0.000914701	0.00782394
NM_001009182	SIP1	mRNA	0.000919551	0.00785757
NM_182985	TRIM69	mRNA	0.000923486	0.00787179
NM_005507	CFL1	mRNA	0.000923956	0.00787179
NM_006368	CREB3	mRNA	0.000923979	0.00787179
NM_078626	CDKN2C	mRNA	0.000925352	0.00787563
XM_001130742	ATP6V0C	mRNA	0.000929501	0.00790307
NM_004359	CDC34	mRNA	0.000931281	0.00790757
NM_198310	TTC8	mRNA	0.000932005	0.00790757
NM_004395	DBN1	mRNA	0.000932806	0.00790757
NM_144508	CASC5	mRNA	0.000943797	0.00799281
AW020492		mRNA	0.000947381	0.00801522
NM_013342	TFPT	mRNA	0.000958354	0.00810003
NM_005207	CRKL	mRNA	0.000960536	0.00810339
XM_001129173	LOC731314	mRNA	0.000960647	0.00810339
XM_944197	LOC645253	mRNA	0.000962005	0.00810684
NM_001124	ADM	mRNA	0.000963991	0.00811557
NM_133433	NIPBL	mRNA	0.00097603	0.00820883
NM_032725	BUD13	mRNA	0.000978772	0.0082238
NM_144999	LRRC45	mRNA	0.000983194	0.00824787
NM_002198	IRF1	mRNA	0.000983568	0.00824787
NM_032576	CYorf15B	mRNA	0.000986393	0.00826346
NM_001083335	ZNF228	mRNA	0.00098741	0.00826388
NM_013320	HCFC2	mRNA	0.000988378	0.00826389
NM_178578	PSMF1	mRNA	0.000992802	0.00829276
BG506355		mRNA	0.000998138	0.00832919
NM_005480	TROAP	mRNA	0.00100586	0.00838547
NM_015449	C1orf43	mRNA	0.00100924	0.00840544
NM_006793	PRDX3	mRNA	0.00101157	0.00841275
NM_016581	ECSIT	mRNA	0.00101209	0.00841275
NM_006014	LAGE3	mRNA	0.00102286	0.008494
BX538009		mRNA	0.00102641	0.00851519
NM_020750	XPO5	mRNA	0.00102859	0.00852501
NM_001024845	SLC6A9	mRNA	0.00103988	0.00860077
NM_022909	CENPH	mRNA	0.0010399	0.00860077
NM_021922	FANCE	mRNA	0.00104131	0.00860077
AK123264		mRNA	0.00104227	0.00860077
NM_001031689	PLAA	mRNA	0.00104304	0.00860077
NM_000594	TNF	mRNA	0.00104377	0.00860077
NM_002355	M6PR	mRNA	0.00104478	0.00860079
NM_152424	FAM123B	mRNA	0.00104644	0.00860617
NM_181503	EXOSC8	mRNA	0.00105861	0.00869792
NM_005433	YES1	mRNA	0.00106557	0.00873724
NM_198925	SEMA4B	mRNA	0.00106887	0.00873724
NM_014793	LCMT2	mRNA	0.00106927	0.00873724
NM_007075	WDR45	mRNA	0.00106929	0.00873724
NM_152259	C15orf42	mRNA	0.0010693	0.00873724
NM_000295	SERPINA1	mRNA	0.00106953	0.00873724
NM_002835	PTPN12	mRNA	0.00107155	0.00874533
NM_004591	CCL20	mRNA	0.00108045	0.00880962
NM_020383	XPNPEP1	mRNA	0.00108413	0.00883115
NM_194272	RBPMS2	mRNA	0.00108559	0.00883461
NM_000254	MTR	mRNA	0.00109061	0.00886701
NM_032409	PINK1	mRNA	0.00109377	0.00887289
NM_000126	ETFA	mRNA	0.00109412	0.00887289
NM_018683	ZNF313	mRNA	0.00109444	0.00887289
NM_015341	NCAPH	mRNA	0.00110115	0.00891472
NM_017827	SARS2	mRNA	0.00110169	0.00891472
NM_152692	C1GALT1C1	mRNA	0.00110491	0.00893229
NM_032924	ZNF3	mRNA	0.00112049	0.00904974
NM_000318	PXMP3	mRNA	0.00112772	0.00909361
NM_001032292	ZNF174	mRNA	0.00112806	0.00909361
AK092074		mRNA	0.00113193	0.00911625
NM_173511	ALS2CR13	mRNA	0.00113416	0.00911705
XR_015382	LOC728811	mRNA	0.00113416	0.00911705
NM_015116	LRCH1	mRNA	0.00113626	0.00912529
NM_018677	ACSS2	mRNA	0.0011383	0.00913309
NM_014028	OSTM1	mRNA	0.00114772	0.00920005
NM_001358	DHX15	mRNA	0.00115027	0.00921188
NM_000633	BCL2	mRNA	0.00115192	0.00921642
NM_002914	RFC2	mRNA	0.00115581	0.0092389
NM_021133	RNASEL	mRNA	0.0011606	0.00926855
NM_006805	HNRPA0	mRNA	0.00117128	0.00934508
NM_003688	CASK	mRNA	0.0011803	0.00940126
NM_014497	ZNF638	mRNA	0.00118052	0.00940126
NM_000791	DHFR	mRNA	0.00119649	0.00951954
NM_005572	LMNA	mRNA	0.00119917	0.00953199
NM_183241	C9orf142	mRNA	0.00120385	0.00955421
NM_014660	PHF14	mRNA	0.0012042	0.00955421
NM_202003	FOXM1	mRNA	0.00120869	0.00957909
NM_001080411	ZNF433	mRNA	0.00120958	0.00957909
NM_004070	CLCNKA	mRNA	0.00121177	0.00958563
NM_033084	FANCD2	mRNA	0.00121265	0.00958563
NM_016604	JMJD1B	mRNA	0.00122404	0.00964434
NM_016038	SBDS	mRNA	0.00122468	0.00964434
BI258188		mRNA	0.0012253	0.00964434
NM_022154	SLC39A8	mRNA	0.00122545	0.00964434
NM_025155	WDR71	mRNA	0.00122683	0.00964434
NM_152924	ABHD2	mRNA	0.00122685	0.00964434
XR_018553	LOC648294	mRNA	0.00124171	0.00975223
NM_020199	C5orf15	mRNA	0.00124286	0.00975228
NM_001029998	SLC10A7	mRNA	0.00124805	0.00978399
NM_019048	ASNSD1	mRNA	0.00125246	0.00980959
NM_015665	AAAS	mRNA	0.00126191	0.00987452
NM_016458	C8orf30A	mRNA	0.00126508	0.00988208
NM_032740	SFT2D3	mRNA	0.00126518	0.00988208
NM_025241	UBXD1	mRNA	0.00127105	0.00991881
NM_001037639	PARL	mRNA	0.00127432	0.00993526
NM_015135	NUP205	mRNA	0.00127657	0.00993814
NM_004238	TRIP12	mRNA	0.00127701	0.00993814
NM_000154	GALK1	mRNA	0.00128275	0.0099737
NM_003899	ARHGEF7	mRNA	0.00128622	0.00999161
miR-222	miR-222	microRNA	2.38e-08	3.74e-06
miR-221	miR-221	microRNA	6.02e-08	4.73e-06
miR-331	miR-331	microRNA	4.3e-06	0.000169
miR-16	miR-16	microRNA	3.07e-05	0.000964
miR-145	miR-145	microRNA	6.22e-05	0.00163
miR-9*	miR-9*	microRNA	8.57e-05	0.00192
miR-551a	miR-551a	microRNA	9.92e-05	0.00195
